# Supplementary material for: Taxon Richness of “Megaviridae” Exceeds those of Bacteria and Archaea in the Ocean
Source: PubMed Central journal article supplement (PMC6031395; doi:10.1264/jsme2.me17203), 2018-05-25
Supplement: 33_162_s1.pdf [file 33_162_s1.pdf]

**Table S1.** Metagenomic data used in this study.

| <b>MARINE</b>                     | <b>Filter Min-Max</b>                                      | <b>No of ORFs</b>  | <b>No of Rpb2</b> | <b>No. of Rpb1</b> |
|-----------------------------------|------------------------------------------------------------|--------------------|-------------------|--------------------|
| <b>Total</b>                      |                                                            | <b>101,856,227</b> | <b>147,053</b>    | <b>163,080</b>     |
| Tara Oceans <sup>a</sup>          | -0.22, 0.1-0.22, 0.22-0.8, 0.45-0.8, 0.2-1.6 or 0.2-3.0 µm | 61,655,613         | 90,507            | 99,453             |
| Tara Oceans (454) <sup>b</sup>    | 0.22-1.6 µm                                                | 1,421,586          | 2,810             | 3,398              |
| CAM_PROJ_GOS                      | 0.002-0.22, 0.1-0.8, 0.22-0.8, 0.8-3 or 3-20 µm            | 11,301,013         | 15,664            | 17,783             |
| CAM_P_0000692                     | 0.2-20 µm                                                  | 7,092,526          | 13,349            | 14,458             |
| CAM_PROJ_AntarcticaAquatic        | 0.1-, 0.1-0.8, 0.8-, 0.8-3, 3- or 3-200 µm                 | 7,748,903          | 11,138            | 12,163             |
| CAM_P_0001109                     | 0.1-0.8, 0.8-3 or 3-200 µm                                 | 3,360,214          | 5,516             | 5,926              |
| CAM_PROJ_BotanyBay                | 0-3, 0.1-0.8, 0.8-3 or 1-1 µm                              | 4,276,800          | 2,858             | 4,060              |
| CAM_P_0001069                     | 0.1-, 0.8- or 3.0- µm (-20 µm)                             | 1,986,898          | 2,020             | 2,166              |
| CAM_P_0001026                     | 0.22-5 µm                                                  | 506,581            | 933               | 1,100              |
| CAM_P_0000712                     | 0.2- µm                                                    | 266,981            | 453               | 539                |
| CAM_PROJ_WesternChannelOMM        | 0.22- µm                                                   | 251,564            | 260               | 403                |
| CAM_P_0000545                     | 0.2- µm                                                    | 106,660            | 159               | 208                |
| CAM_PROJ_EpibiontMetagenome       | NA                                                         | 146,343            | 262               | 257                |
| CAM_PROJ_AlvinellaPompejana       | NA                                                         | 65,605             | 239               | 231                |
| CAM_P_0000828                     | -0.22 µm                                                   | 95,931             | 135               | 157                |
| CAM_PROJ_HOT                      | 0.22-1.6 µm                                                | 120,944            | 115               | 119                |
| CAM_PROJ_WhaleFall                | NA                                                         | 89,035             | 101               | 118                |
| CAM_P_0001133                     | 0.1-, 0.8- or 3.0- µm                                      | 90,028             | 122               | 145                |
| CAM_PROJ_GutlessWorm              | NA                                                         | 197,680            | 110               | 105                |
| CAM_PROJ_HydrothermalVent         | NA                                                         | 43,384             | 58                | 55                 |
| CAM_PROJ_HypersalineMat           | NA                                                         | 161,473            | 80                | 74                 |
| CAM_P_0001129                     | 0.2-5 µm                                                   | 4,379              | 12                | 13                 |
| CAM_P_0001028                     | 0.8-3 µm                                                   | 29,319             | 21                | 34                 |
| CAM_P_0001196                     | *                                                          | 28,426             | 21                | 32                 |
| CAM_P_00001027                    | NA                                                         | 181,508            | 26                | 23                 |
| CAM_P_0000912                     | -1 µm                                                      | 153,798            | 24                | 18                 |
| CAM_P_0000915                     | 0.22- µm                                                   | 254,039            | 24                | 15                 |
| CAM_P_0000914                     | 0.2-2.7 µm                                                 | 194,763            | 10                | 10                 |
| CAM_PROJ_DeepMed                  | 0.22-5 µm                                                  | 6,181              | 11                | 2                  |
| CAM_PROJ_PacificOcean             | 0.2-5 µm                                                   | 5,623              | 7                 | 8                  |
| CAM_PROJ_PBMS                     | NA                                                         | 12,429             | 8                 | 7                  |
| <b>OTHER AQUATIC ENVIRONMENT</b>  |                                                            |                    |                   |                    |
| <b>Total</b>                      |                                                            | <b>8,385,210</b>   | <b>8,647</b>      | <b>8,993</b>       |
| environmental_T30141 <sup>c</sup> | NA                                                         | 2,412              | 0                 | 0                  |
| CAM_PROJ_YLake                    | 0.8- and 3- µm                                             | 3,139,742          | 4,135             | 3,955              |
| CAM_P_0001136                     | NA                                                         | 2,568,652          | 1,311             | 1,343              |
| CAM_P_0001174                     | 0.1-0.8, 0.8-3 or 3-200 µm                                 | 739,134            | 1,508             | 1,720              |
| CAM_PROJ_BisonMetagenome          | NA                                                         | 679,211            | 666               | 669                |
| CAM_P_0001130                     | NA                                                         | 216,114            | 327               | 404                |
| CAM_P_0001131                     | NA                                                         | 188,446            | 201               | 315                |
| CAM_PROJ_WashingtonLake           | NA                                                         | 471,326            | 137               | 142                |
| CAM_P_0001132                     | 0.1-, 0.8- or 3.0- µm                                      | 205,930            | 188               | 193                |
| CAM_P_0001128                     | 0.2-5 µm                                                   | 98,421             | 112               | 167                |
| CAM_PROJ_ViralSpring              | -0.2 µm                                                    | 18,943             | 28                | 29                 |
| CAM_PROJ_Yellowstone              | NA                                                         | 56,879             | 34                | 56                 |
| <b>MAMMAL ASSOCIATED</b>          |                                                            |                    |                   |                    |
| <b>Total</b>                      |                                                            | <b>38,341,510</b>  | <b>38,600</b>     | <b>41,470</b>      |
| organismal <sup>c</sup>           | NA                                                         | 37,169,008         | 37,617            | 40,461             |
| CAM_PROJ_HumanGut                 | 100-100 µm                                                 | 670,835            | 439               | 471                |
| CAM_PROJ_HumanDistalGut           | NA                                                         | 219,736            | 260               | 219                |
| CAM_PROJ_TwinStudy                | NA                                                         | 126,420            | 181               | 188                |
| CAM_P_0000523                     | NA                                                         | 42,367             | 86                | 112                |
| CAM_PROJ_MouseGut                 | NA                                                         | 15,204             | 13                | 9                  |
| CAM_P_0000909                     | -0.45 µm                                                   | 97,940             | 4                 | 10                 |
| <b>OTHERS</b>                     |                                                            |                    |                   |                    |
| <b>Total</b>                      |                                                            | <b>1,063,049</b>   | <b>895</b>        | <b>978</b>         |
| environmental_T30140 <sup>c</sup> | NA                                                         | 8,675              | 0                 | 0                  |
| CAM_PROJ_AcidMine                 | 0.45- or 0.2- µm                                           | 229,511            | 489               | 492                |
| CAM_PROJ_EBPRSludge               | NA                                                         | 198,391            | 158               | 134                |
| CAM_PROJ_TermiteGut               | NA                                                         | 79,498             | 120               | 155                |
| CAM_PROJ_SAM                      | 0.2- µm                                                    | 394,096            | 41                | 89                 |
| CAM_PROJ_FarmSoil                 | NA                                                         | 113,301            | 43                | 56                 |
| CAM_P_0000504                     | -1000 µm                                                   | 32,745             | 37                | 46                 |
| CAM_P_0000911                     | NA                                                         | 6,832              | 7                 | 6                  |

<sup>a</sup> Sunagawa et al., Science, 348, 1261359 (2015).

<sup>b</sup> Hingamp et al., ISME J, 7, 1678-1695 (2013).

<sup>c</sup> KEGG/MGENES (<http://www.genome.jp/mgenes/>).

\* Metadata were not available.

NA Filter size data were not available in the metadata.

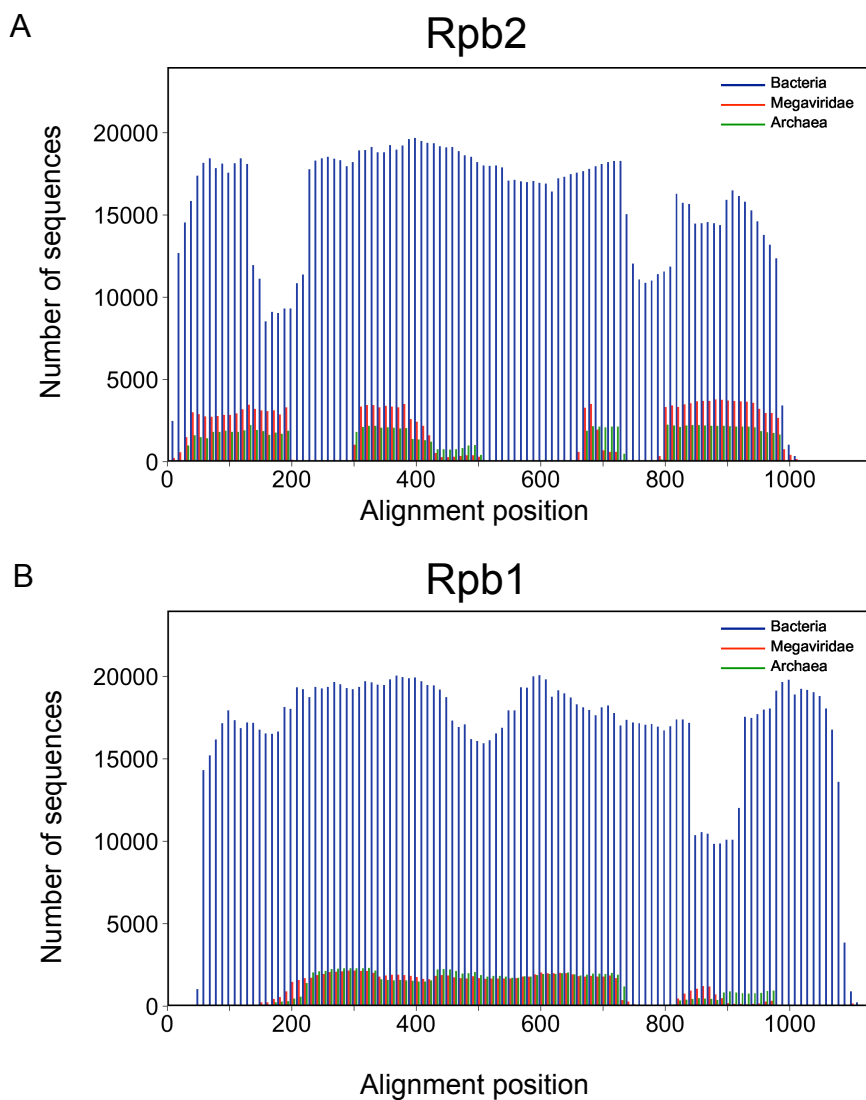

**Supplementary Fig. S1. Distribution of metagenomic sequences mapped on the reference alignments.** (A) Metagenomic sequences mapped on the Megaviridae, Bacteria and Archaea Rpb2 reference alignment (RAIn-MBA-Rpb2). (B) Metagenomic sequences mapped on the Megaviridae, Bacteria and Archaea Rpb1 reference alignment (RAIn-MBA-Rpb1). Metagenomic sequences analyzed here were derived from marine metagenomes. X-axis indicates positions in the reference alignments and Y-axis represents the number of sequences. Color codes are red for Megaviridae, blue for Bacteria and green for Archaea.

A

Clustering  
cutoff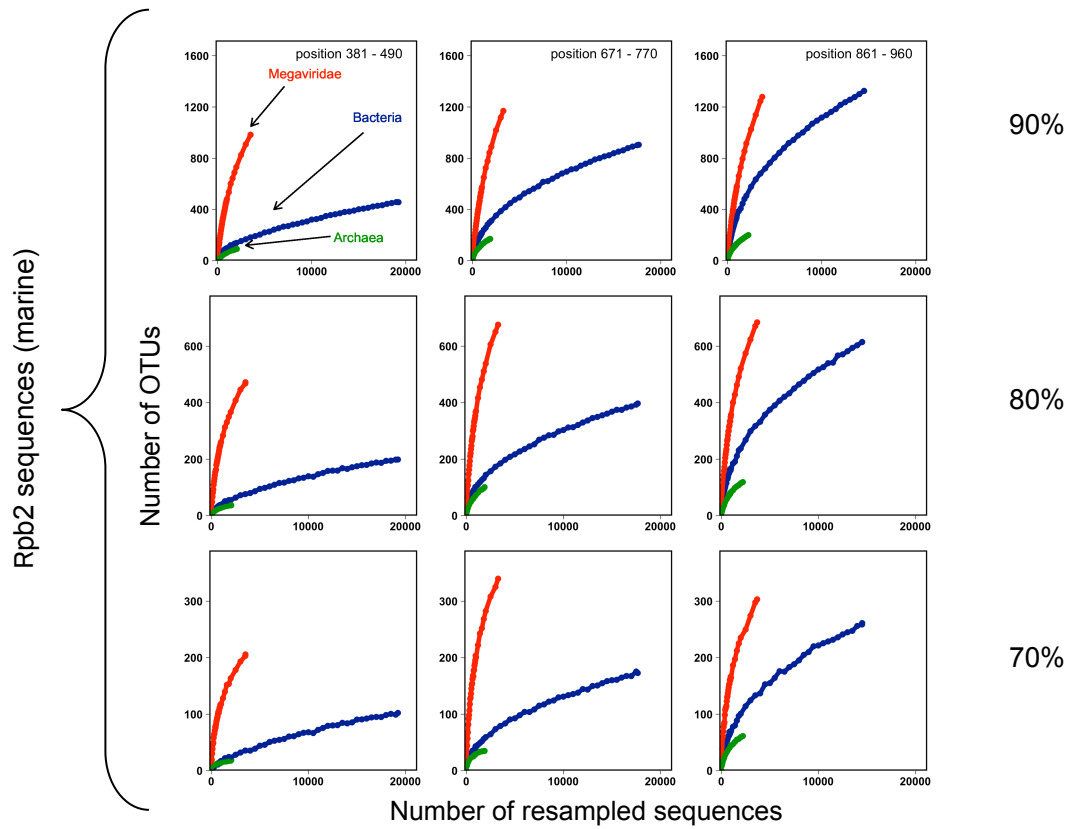

B

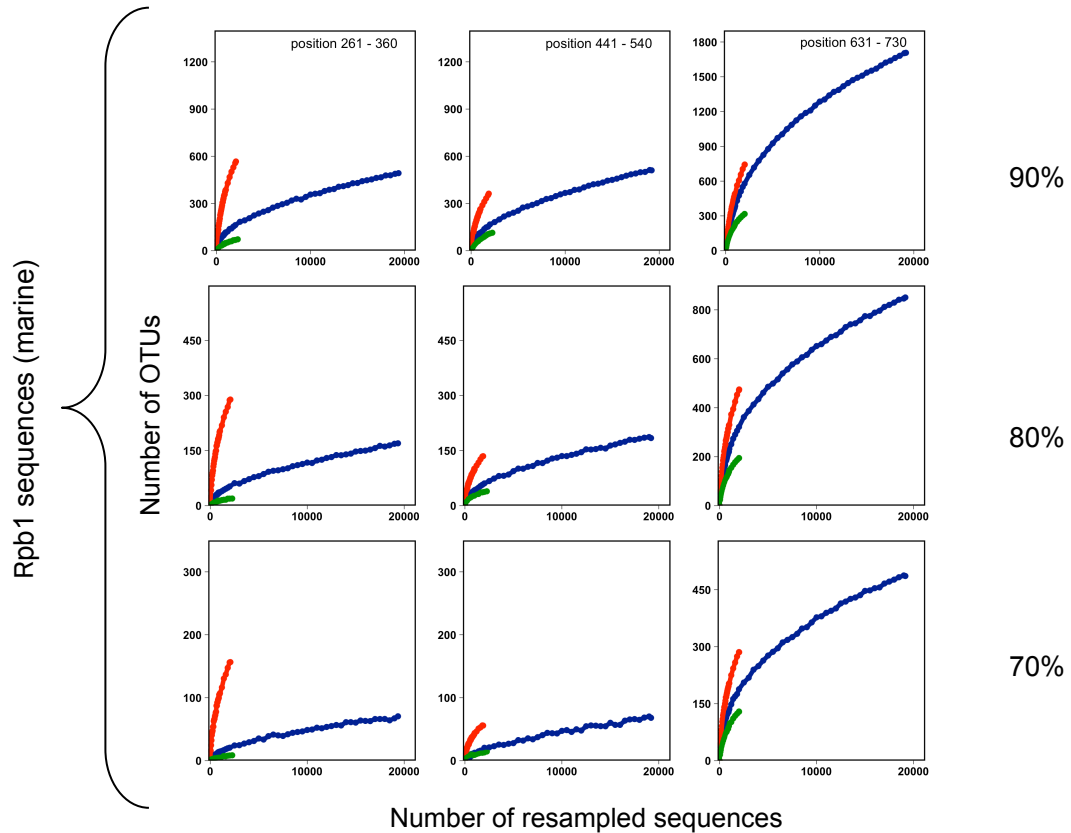

**Supplementary Fig. S2. Rarefaction curves of richness for metagenomic Rpb2/Rpb1 sequences.** Three cutoff values (90%, 80% and 70%) were used to generate OTUs. (A) Rarefaction curves for marine metagenomic Rpb2 sequences. (B) Rarefaction curves for marine metagenomic Rpb1 sequences. (C) Rarefaction curves for total metagenomic Rpb2 sequences. (D) Rarefaction curves for total metagenomic Rpb1 sequences.

**C**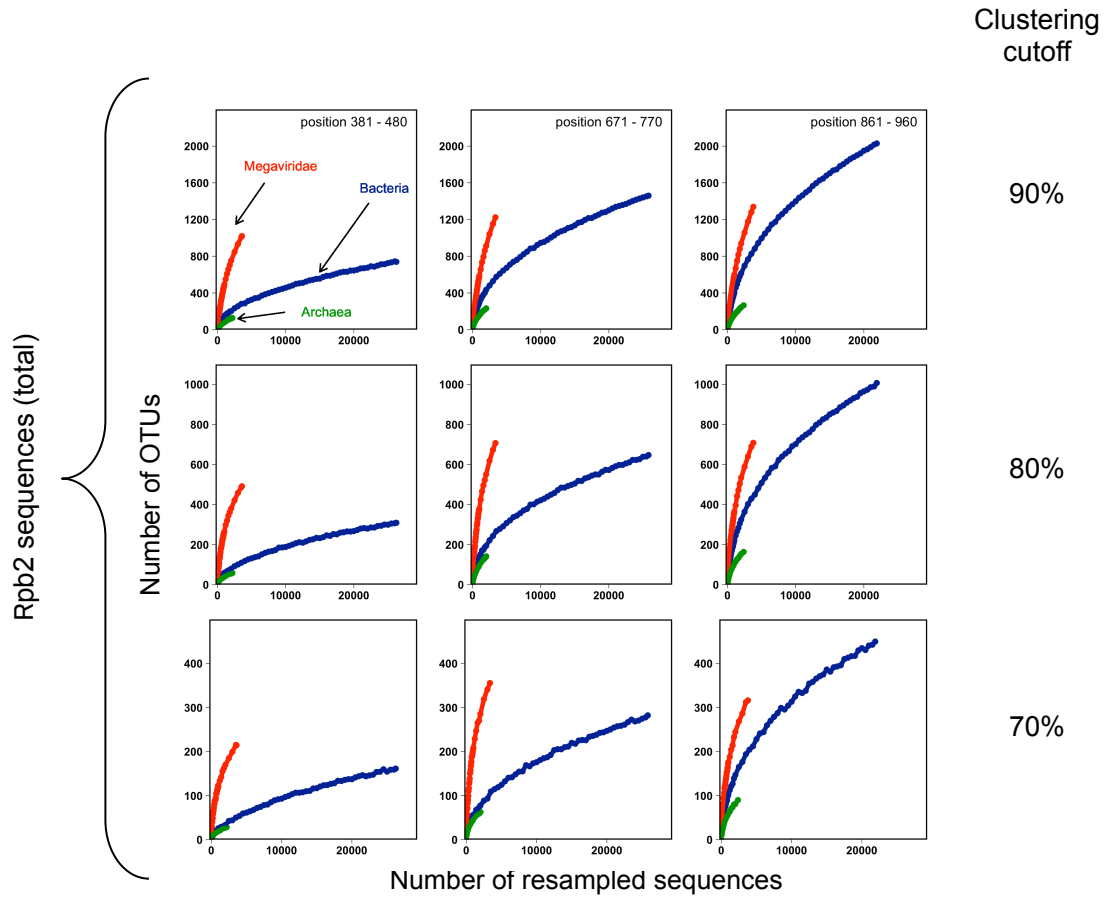**D**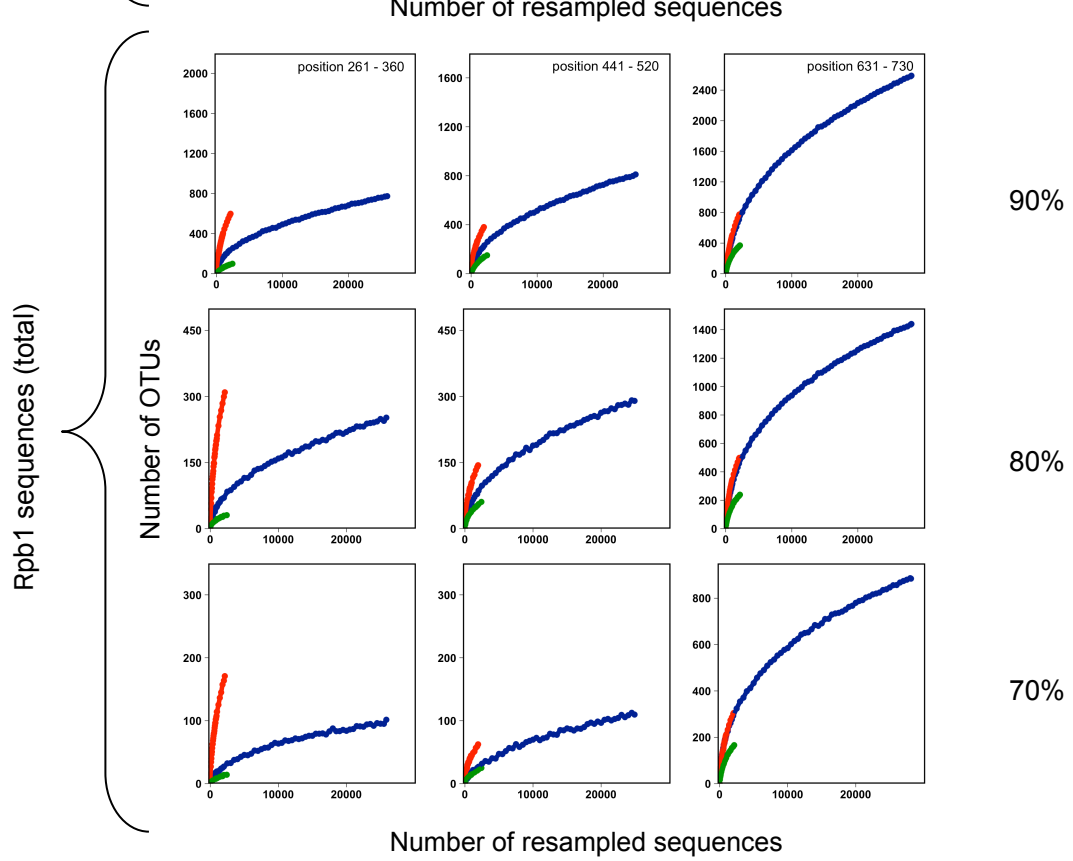

A

Position: 331-530

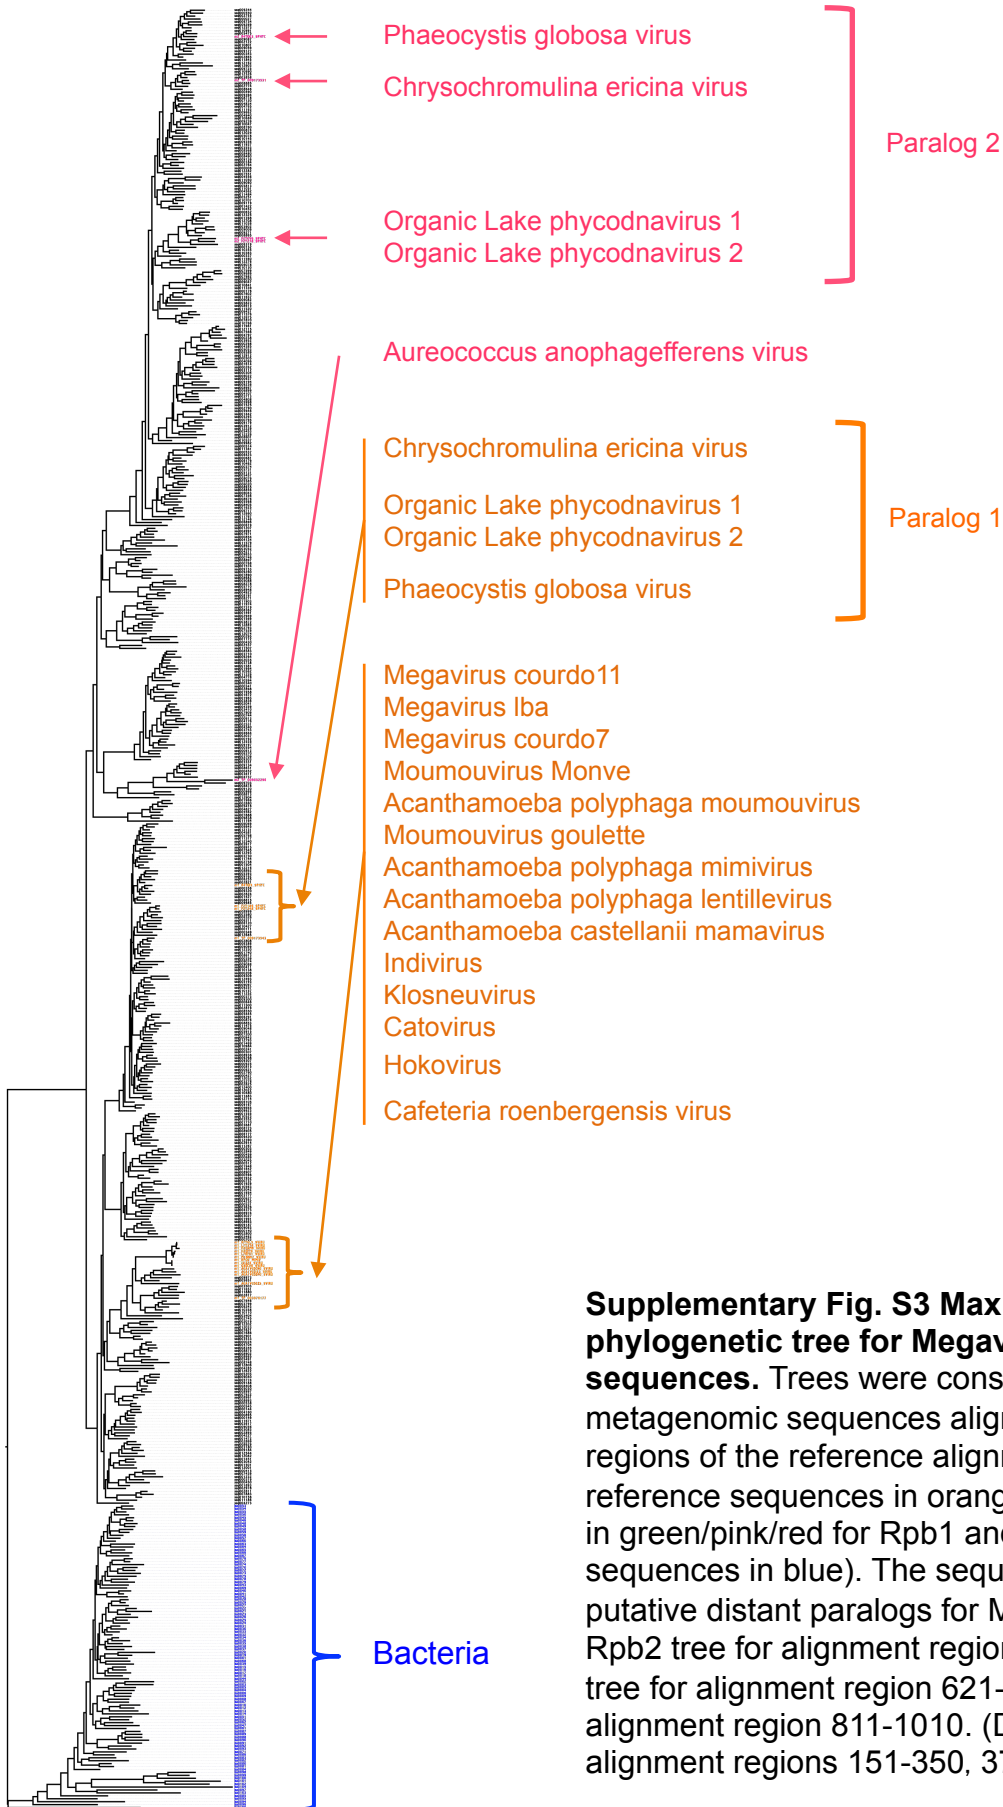

**Supplementary Fig. S3 Maximum likelihood phylogenetic tree for Megaviridae metagenomic sequences.** Trees were constructed from marine metagenomic sequences aligned on distinct regions of the reference alignment (Megaviridae reference sequences in orange/pink for Rpb2 and in green/pink/red for Rpb1 and bacterial reference sequences in blue). The sequences in pink indicate putative distant paralogs for Megaviridae Rpb2. (A) Rpb2 tree for alignment region 331-530. (B) Rpb2 tree for alignment region 621-820. (C) Rpb2 tree for alignment region 811-1010. (D) Rpb1 trees for alignment regions 151-350, 371-570, and 551-750.

B

Position: 621-820

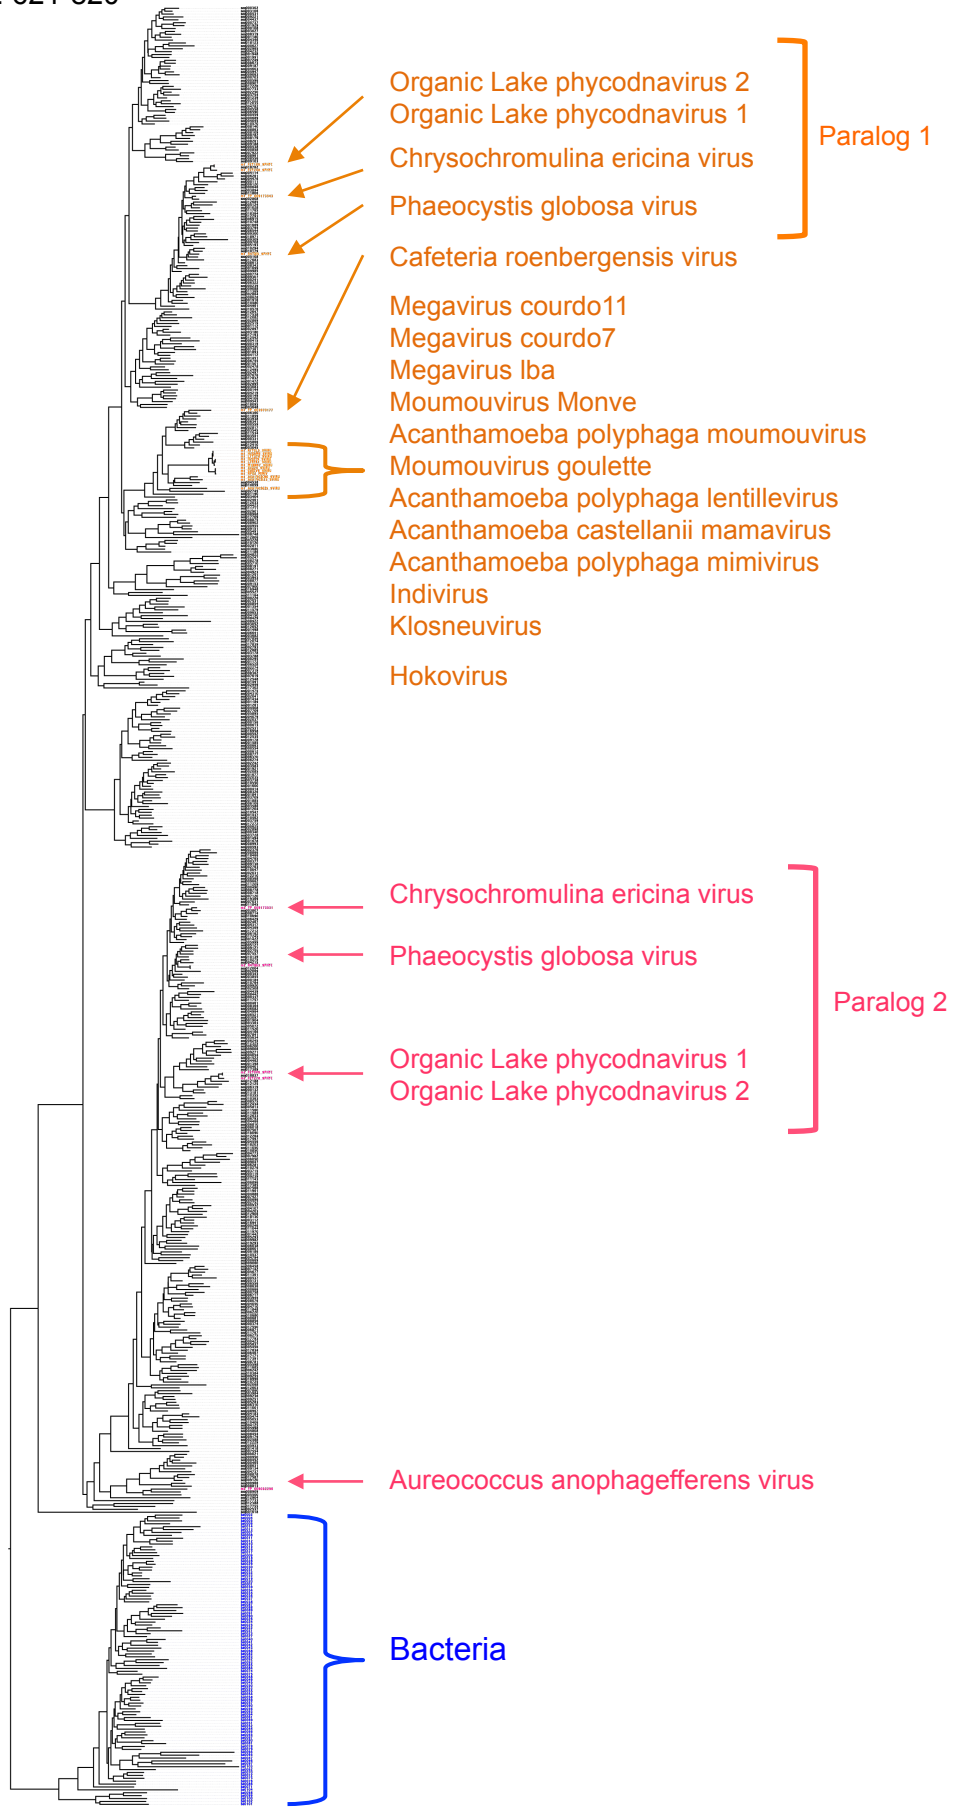

Supplementary Fig. S3 (Continued)

C

Position: 811-1010

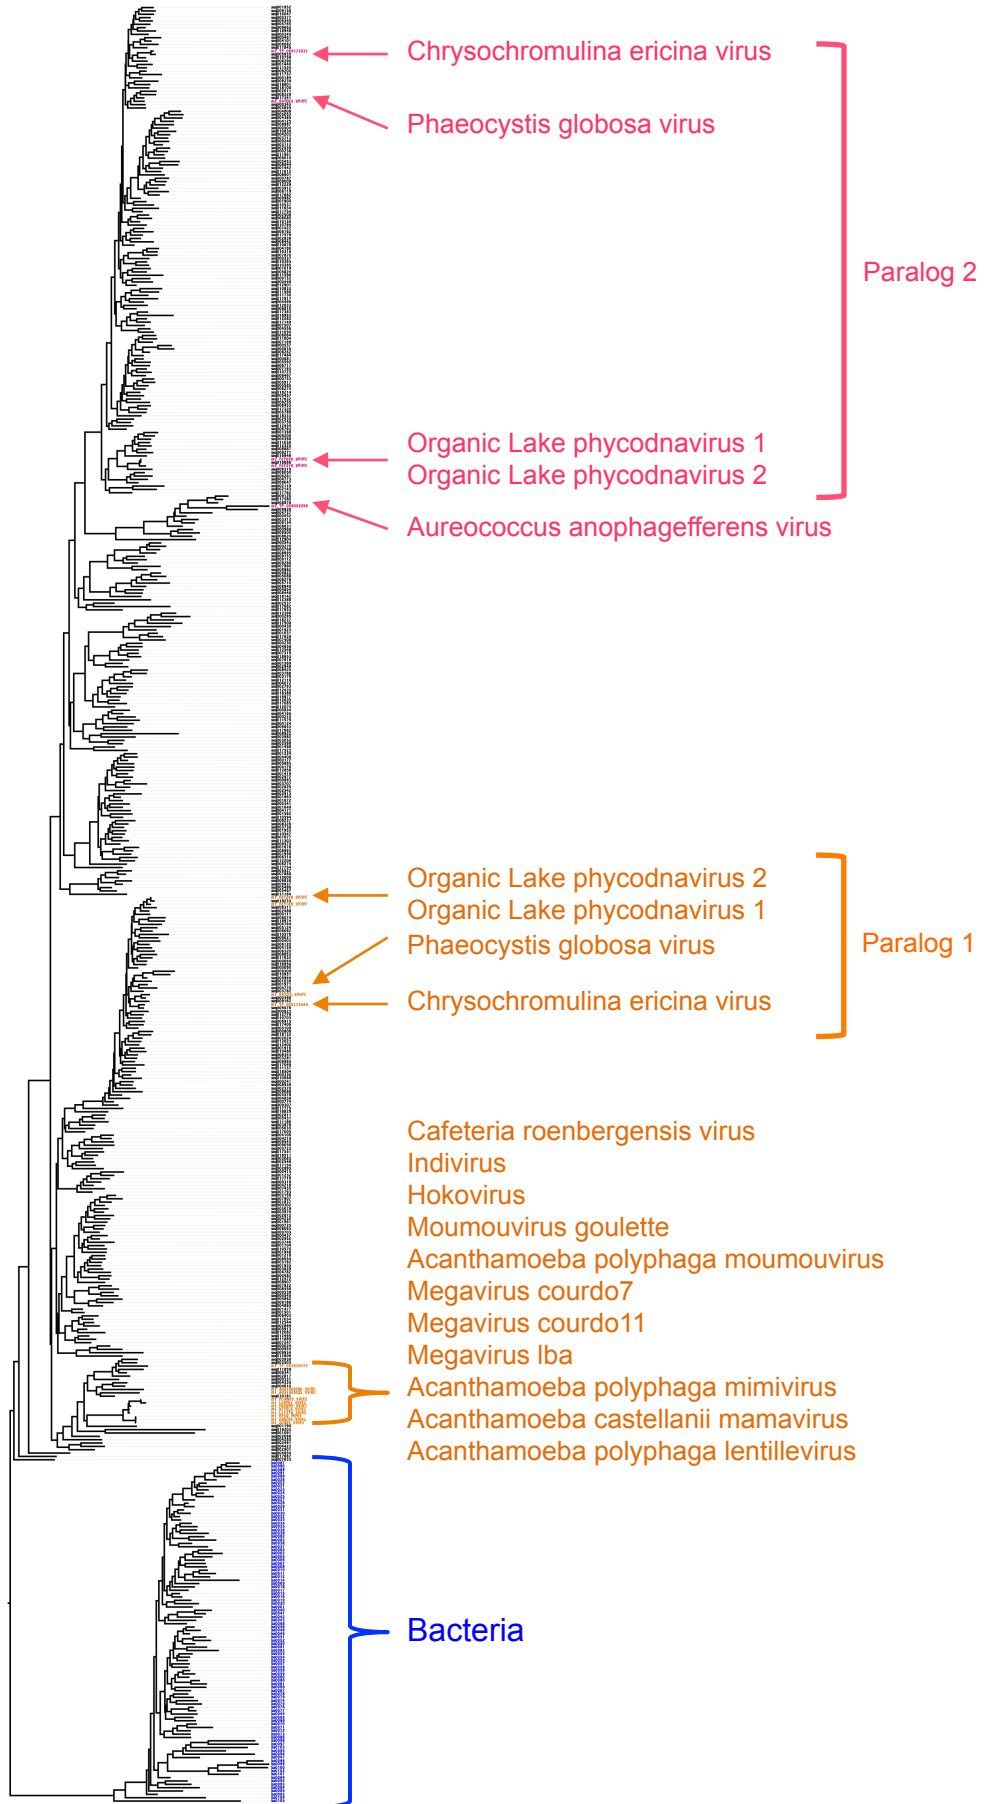

Supplementary Fig. S3 (Continued)

**D**

Position 151-350

Position 371-570

Position 551-750

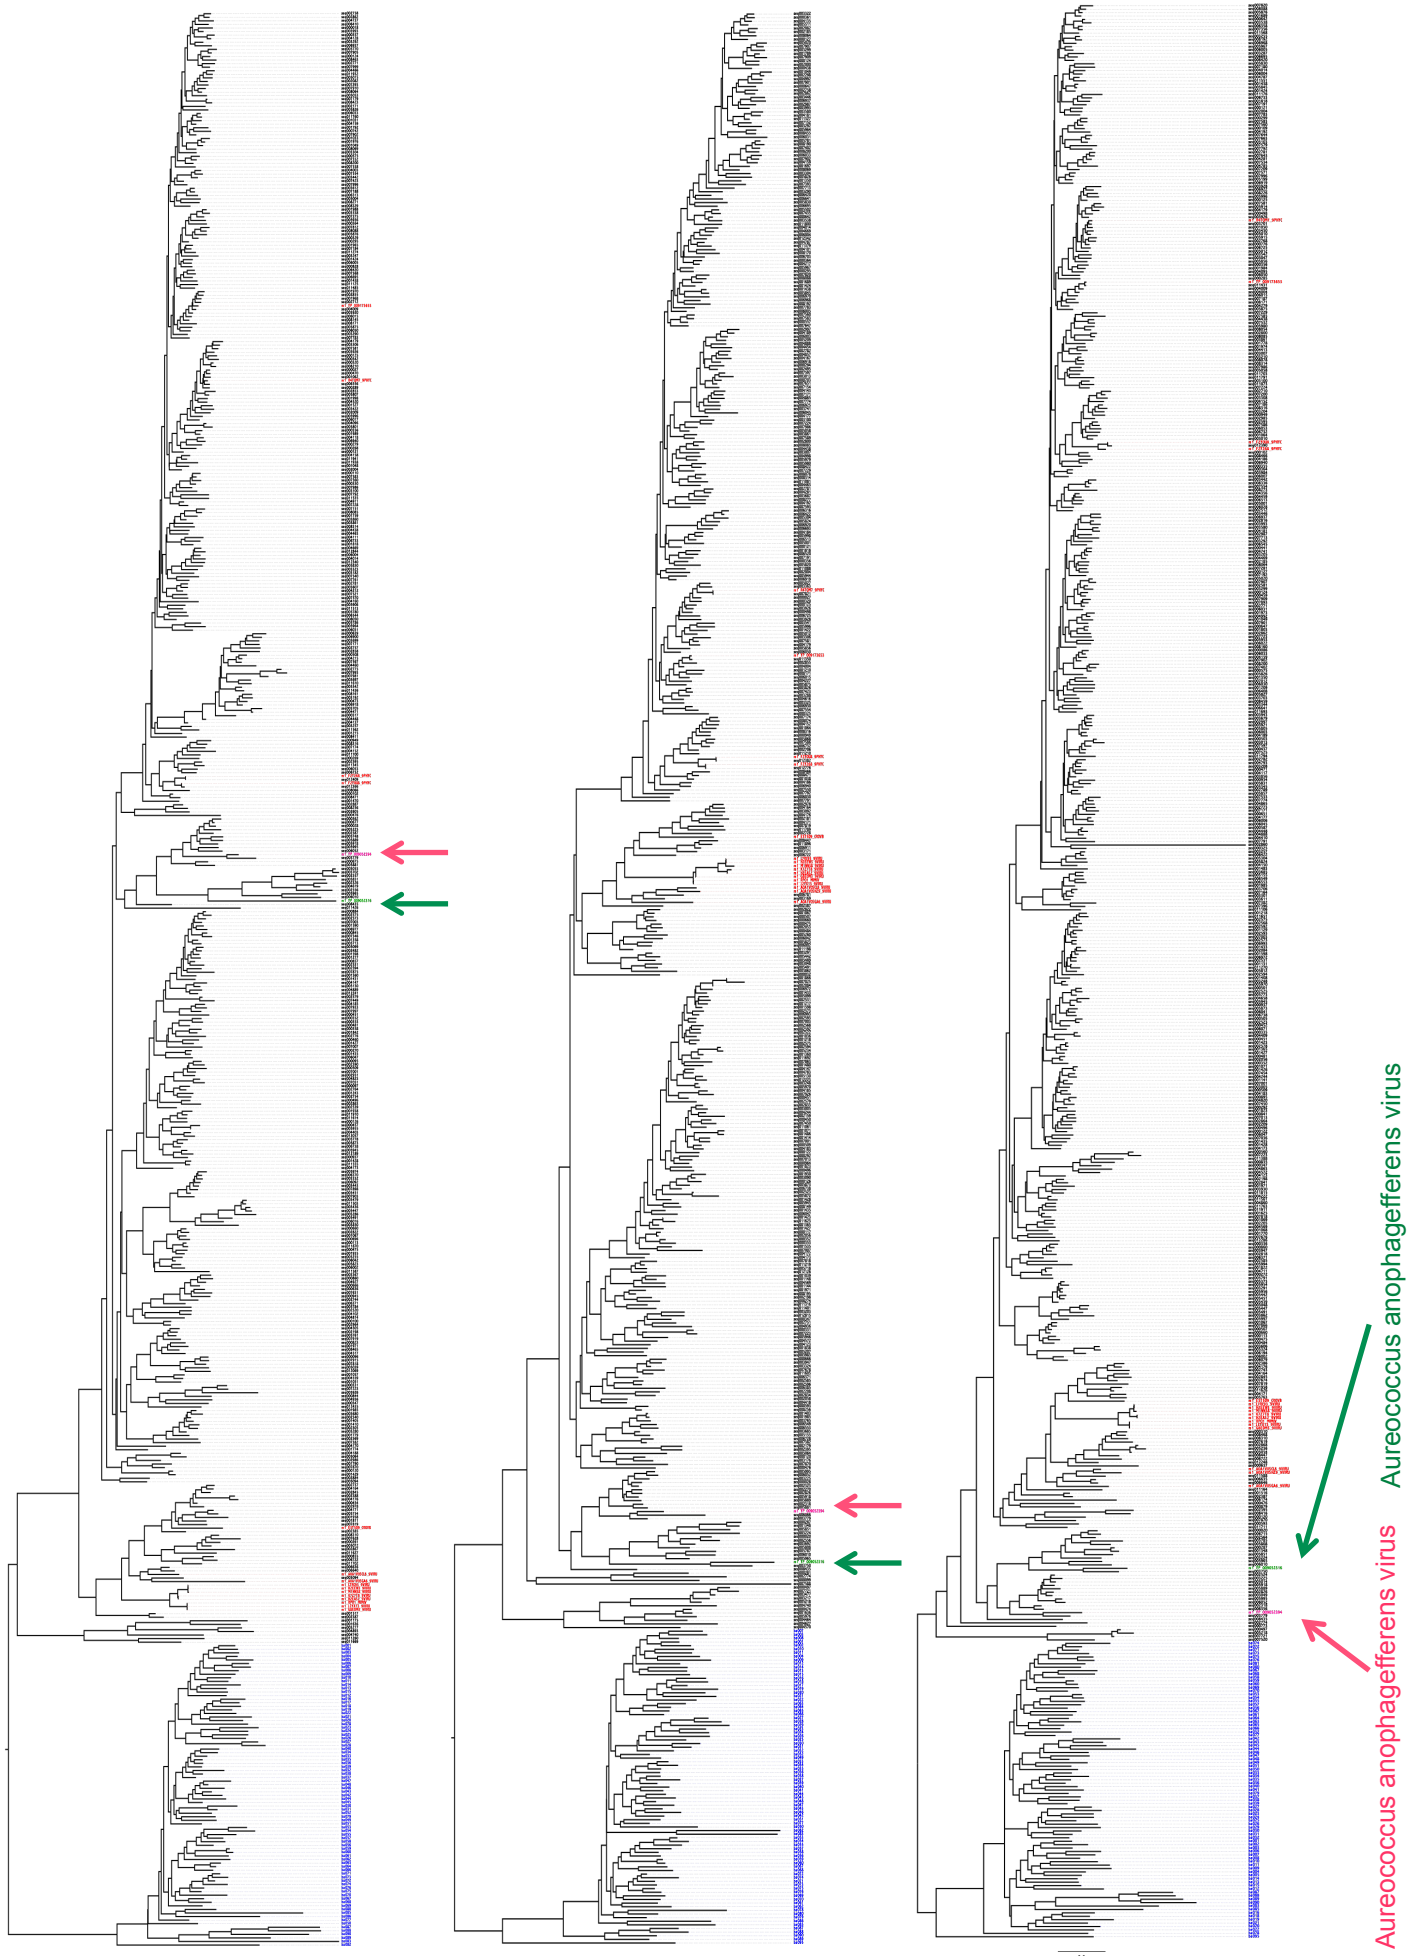

Supplementary Fig. S3 (Continued)

**Aureococcus anophagefferens virus** **Aureococcus anophagefferens virus**
